# Supplementary material
Source: PubMed Central journal article supplement (PMC10202849)
Supplement: NIHMS1844701-supplement-Supplemental_2.pdf [file NIHMS1844701-supplement-Supplemental_2.pdf]

# THE LANCET

## Infectious Diseases

### Supplementary appendix 2

This appendix formed part of the original submission and has been peer reviewed.  
We post it as supplied by the authors.

Supplement to: Uwimana A, Umulisa N, Venkatesan M, et al. Association of *Plasmodium falciparum* kelch13 R561H genotypes with delayed parasite clearance in Rwanda: an open-label, single-arm, multicentre, therapeutic efficacy study. *Lancet Infect Dis* 2021; published online April 14. [https://doi.org/10.1016/S1473-3099\(21\)00142-0](https://doi.org/10.1016/S1473-3099(21)00142-0).

## Supplementary material

### Supplemental Figure 1: Kaplan-Meier curves per site

Uncorrected and PCR-corrected Kaplan-Meier survival curves of time to recurrence among participants enrolled in the 2018 antimalarial therapeutic efficacy study. All participants were treated with artemether-lumefantrine. + signs indicate censoring.

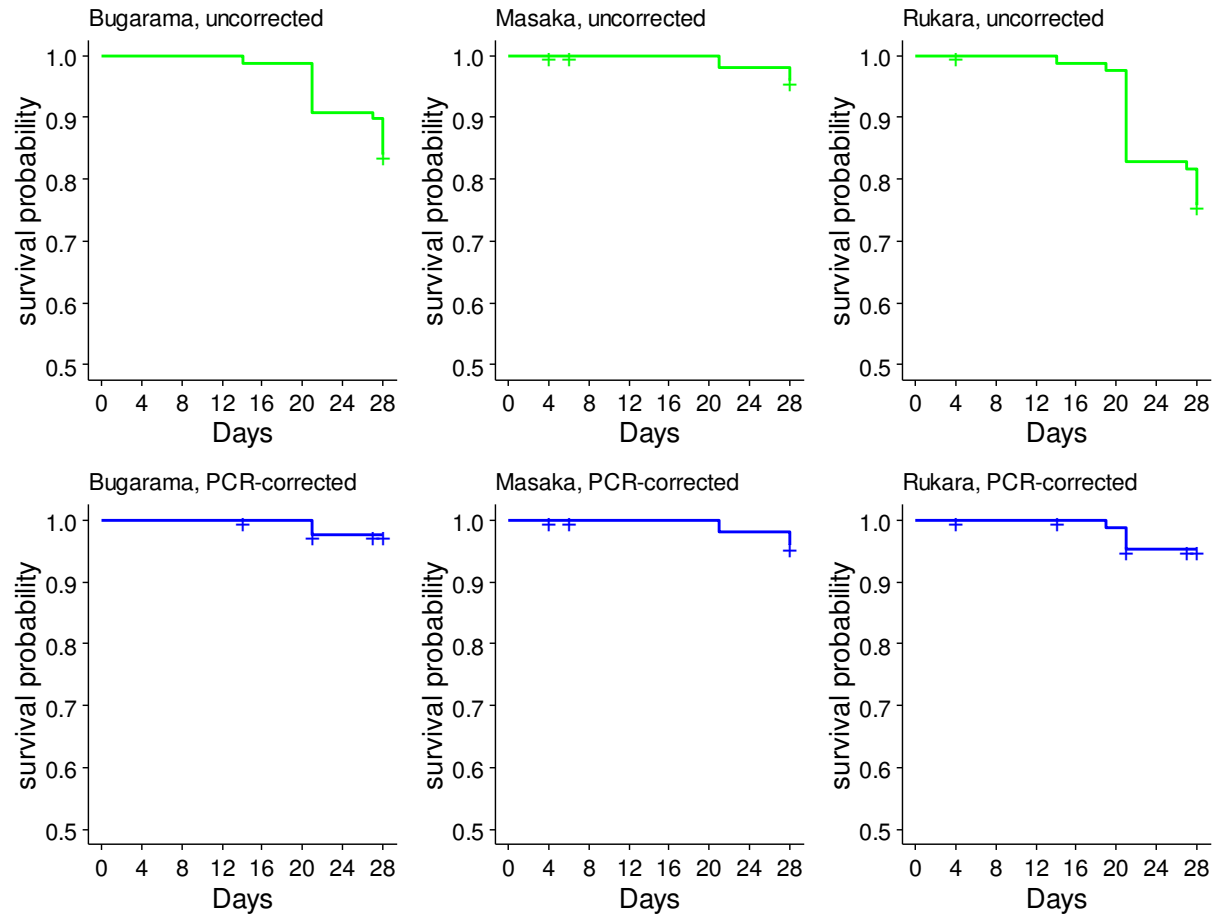

**Number at risk (censored) per day by site**

| Day                       | 1  | 2  | 3  | 4      | 5  | 6      | 7  | 8  | 9  | 10 | 11 | 12 | 13 | 14     | 15 | 16 | 17 | 18 | 19 | 20 | 21         | 22 | 23 | 24 | 25 | 26 | 27 | 28     |        |        |
|---------------------------|----|----|----|--------|----|--------|----|----|----|----|----|----|----|--------|----|----|----|----|----|----|------------|----|----|----|----|----|----|--------|--------|--------|
| Bugarama -<br>Uncorrected | 88 | 88 | 88 | 88     | 88 | 88     | 88 | 88 | 88 | 88 | 88 | 88 | 88 | 87     | 87 | 87 | 87 | 87 | 87 | 87 | 80         | 80 | 80 | 80 | 80 | 80 | 80 | 79     | 74     |        |
| Bugarama -<br>Corrected   | 88 | 88 | 88 | 88     | 88 | 88     | 88 | 88 | 88 | 88 | 88 | 88 | 88 | 88 (1) | 87 | 87 | 87 | 87 | 87 | 87 | 85 (5)     | 80 | 80 | 80 | 80 | 80 | 80 | 80 (1) | 80 (6) |        |
| Masaka-<br>Uncorrected    | 52 | 52 | 52 | 52 (1) | 51 | 51 (1) | 50 | 50 | 50 | 50 | 50 | 50 | 50 | 50     | 50 | 50 | 50 | 50 | 50 | 50 | 49         | 49 | 49 | 49 | 49 | 49 | 49 | 49     | 48     |        |
| Masaka -<br>Corrected     | 52 | 52 | 52 | 52 (1) | 51 | 51 (1) | 50 | 50 | 50 | 50 | 50 | 50 | 50 | 50     | 50 | 50 | 50 | 50 | 50 | 50 | 49         | 49 | 49 | 49 | 49 | 49 | 49 | 49     | 48     |        |
| Rukara -<br>Uncorrected   | 88 | 88 | 88 | 88 (1) | 87 | 87     | 87 | 87 | 87 | 87 | 87 | 87 | 87 | 86     | 86 | 86 | 86 | 86 | 86 | 85 | 85         | 72 | 72 | 72 | 72 | 72 | 72 | 72     | 71     | 66 (1) |
| Rukara -<br>Corrected     | 88 | 88 | 88 | 89 (1) | 87 | 87     | 87 | 87 | 87 | 87 | 87 | 87 | 87 | 87 (1) | 86 | 86 | 86 | 86 | 85 | 85 | 82<br>(10) | 72 | 72 | 72 | 72 | 72 | 72 | 72 (1) | 71 (6) |        |



**Table S2: Prevalence of *pfmdr1* polymorphisms in pre-treatment and post-treatment samples**

|                    | Pre-treatment infections |                  |                  |                 | Post-treatment infections |                  |                  |                 |
|--------------------|--------------------------|------------------|------------------|-----------------|---------------------------|------------------|------------------|-----------------|
|                    | Bugarama,<br>n (%)       | Masaka,<br>n (%) | Rukara,<br>n (%) | Total,<br>n (%) | Bugarama,<br>n (%)        | Masaka,<br>n (%) | Rukara,<br>n (%) | Total,<br>n (%) |
| <b>SNPs</b>        | N = 85                   | N = 41           | N = 82           | 208             | N = 13                    | N = 2            | N = 20           | 35              |
| <b>N86</b>         | 77(91)                   | 41(100)          | 82(100)          | 200 (96)        | 13(100)                   | 2(100)           | 20(100)          | 35 (100)        |
| <b>86N/Y</b>       | 5(6)                     | 0(0)             | 0(0)             | 5 (2)           | 0(0)                      | 0(0)             | 0(0)             | 0 (0)           |
| <b>86Y</b>         | 3(4)                     | 0(0)             | 0(0)             | 3 (1)           | 0(0)                      | 0(0)             | 0(0)             | 0 (0)           |
| <b>Y184</b>        | 55(65)                   | 15(37)           | 29(35)           | 99 (48)         | 8(62)                     | 2(100)           | 7(35)            | 17 (49)         |
| <b>184Y/F</b>      | 10(12)                   | 1(2)             | 9(11)            | 20 (10)         | 0(0)                      | 0(0)             | 3(15)            | 3 (9)           |
| <b>184F</b>        | 20(24)                   | 25(61)           | 44(54)           | 89 (43)         | 5(38)                     | 0(0)             | 10(50)           | 15 (43)         |
| <b>D1246</b>       | 82(96)                   | 38(93)           | 74(90)           | 194 (93)        | 13(100)                   | 2(100)           | 17(85)           | 32 (91)         |
| <b>1246D/Y</b>     | 0(0)                     | 0(0)             | 4(5)             | 4 (2)           | 0(0)                      | 0(0)             | 1(5)             | 1 (3)           |
| <b>1246Y</b>       | 3(4)                     | 3(7)             | 4(5)             | 10 (5)          | 0(0)                      | 0(0)             | 2(10)            | 2 (6)           |
| <b>Haplotypes†</b> | <b>N = 101</b>           | <b>N = 42</b>    | <b>N = 97</b>    | <b>240</b>      | <b>N = 13</b>             | <b>N = 2</b>     | <b>N = 25</b>    | <b>40</b>       |
| <b>NYD</b>         | 62(61)                   | 16(38)           | 36(37)           | 114 (48)        | 8(62)                     | 2(100)           | 10 (40)          | 20 (50)         |
| <b>YFD</b>         | 1(1)                     | 0(0)             | 0(0)             | 1 (0)           | 0(0)                      | 0(0)             | 0(0)             | 0 (0)           |
| <b>NFD</b>         | 29(29)                   | 23(55)           | 51(53)           | 103 (43)        | 5(38)                     | 0(0)             | 11(44)           | 16 (40)         |
| <b>NFY</b>         | 1(1)                     | 3(7)             | 5(5)             | 9 (4)           | 0(0)                      | 0(0)             | 3(12)            | 3 (8)           |
| <b>NYY</b>         | 0(0)                     | 0(0)             | 5(5)             | 5 (2)           | 0(0)                      | 0(0)             | 1(4)             | 1 (3)           |
| <b>YYD</b>         | 6(6)                     | 0(0)             | 0(0)             | 6 (3)           | 0(0)                      | 0(0)             | 0(0)             | 0 (0)           |
| <b>YFY</b>         | 0(0)                     | 0(0)             | 0(0)             | 0 (0)           | 0(0)                      | 0(0)             | 0(0)             | 0 (0)           |
| <b>YYY</b>         | 2(2)                     | 0(0)             | 0(0)             | 2 (1)           | 0(0)                      | 0(0)             | 0(0)             | 0 (0)           |

† Each possible haplotype constructed from the mixed infections (wildtype and mutant) was reported.
